# Supplementary material for: Health Behavior Changes During COVID-19 Pandemic and Subsequent “Stay-at-Home” Orders
Source: PubMed Central journal article supplement (PMC7504386; doi:10.3390/ijerph17176268), 2020-08-28
Supplement: ijerph-17-06268-s001.pdf [file ijerph-17-06268-s001.pdf]

**Table S1.** Descriptive statistics of positive and negative health behaviors US adults engaged in during COVID-19 pandemic and subsequent “Stay-at-Home” orders and policies, 2020.

| <u>Health behavior</u>                           | <u>Estimate</u>              |
|--------------------------------------------------|------------------------------|
| <b><u>Tobacco use, n (%)</u></b>                 | -                            |
| <u>Never</u>                                     | <u>1,352 (74.7)</u>          |
| <u>Former</u>                                    | <u>279 (15.4)</u>            |
| <u>Current<sup>a</sup></u>                       | <u>178 (9.8)</u>             |
| <b><u>Marijuana use, n (%)</u></b>               | -                            |
| <u>Never</u>                                     | <u>700 (38.7)</u>            |
| <u>Former</u>                                    | <u>879 (48.6)</u>            |
| <u>Current<sup>a</sup></u>                       | <u>230 (12.7)</u>            |
| <b><u>Alcohol consumption per day, n (%)</u></b> | -                            |
| <u>Zero drinks</u>                               | <u>598 (33.1)</u>            |
| <u>1 drink</u>                                   | <u>393 (21.7)</u>            |
| <u>2 drinks</u>                                  | <u>382 (21.1)</u>            |
| <u>3 drinks</u>                                  | <u>193 (10.7)</u>            |
| <u>4 drinks or more</u>                          | <u>243 (13.4)</u>            |
| <b><u>Physical activity</u></b>                  | -                            |
| <u>MET minutes per week, median (IQR)</u>        | <u>2,034 (891.0-4,464.0)</u> |
| <u>Low levels, n (%)</u>                         | <u>433 (23.9)</u>            |
| <u>Moderate levels, n (%)</u>                    | <u>554 (30.6)</u>            |
| <u>High levels, n (%)</u>                        | <u>822 (45.4)</u>            |
| <b><u>Sleep index &amp; quality</u></b>          | -                            |
| <u>PSI, mean (SD)</u>                            | <u>6.5 (3.3)</u>             |
| <u>Very good, n (%)</u>                          | <u>255 (14.1)</u>            |
| <u>Fairly good, n (%)</u>                        | <u>1,050 (58.0)</u>          |
| <u>Fairly bad, n (%)</u>                         | <u>421 (23.3)</u>            |
| <u>Very bad, n (%)</u>                           | <u>83 (4.6)</u>              |

Abbreviations: MET, metabolic equivalent of task; IQR, interquartile range; PSI, Pittsburgh Sleep Index; SD, standard deviation. Note: <sup>a</sup> Includes using the substance on at least 1-day within the past 30-days.

Formatted: Superscript

Formatted: Superscript

**Table S4S2.** Characteristics of a sample of US adults changing negative [health](#) behaviors during the COVID-19 pandemic

|                                          | Tobacco use, n (%) |           |           |       | Marijuana use, n (%) |           |            |       | Alcohol consumption |            |            |       |
|------------------------------------------|--------------------|-----------|-----------|-------|----------------------|-----------|------------|-------|---------------------|------------|------------|-------|
|                                          | Increased          | Decreased | Same      | P     | Increased            | Decreased | Same       | P     | Increased           | Decreased  | Same       | P     |
| <b>Overall</b>                           | 54 (30.5)          | 34 (19.2) | 89 (50.3) | <0.01 | 84 (36.5)            | 24 (10.4) | 122 (53.0) | <0.01 | 521 (38.5)          | 161 (11.9) | 672 (49.6) | <0.01 |
| <b>Sex</b>                               |                    |           |           |       |                      |           |            |       |                     |            |            |       |
| Male                                     | 22 (22.2)          | 23 (23.2) | 54 (54.6) | 0.02  | 32 (33.3)            | 13 (13.5) | 51 (53.1)  | 0.37  | 169 (35.9)          | 55 (11.7)  | 247 (52.4) | 0.30  |
| Female                                   | 32 (41.0)          | 11 (14.1) | 35 (44.9) |       | 52 (38.8)            | 11 (8.2)  | 71 (53.0)  |       | 352 (29.9)          | 106 (12.0) | 425 (48.1) |       |
| <b>Age</b>                               |                    |           |           |       |                      |           |            |       |                     |            |            |       |
| 18-34                                    | 19 (36.5)          | 13 (25.0) | 20 (38.5) | 0.15  | 46 (42.2)            | 8 (7.3)   | 55 (50.5)  | 0.20  | 165 (39.3)          | 80 (19.1)  | 175 (41.7) | <0.01 |
| 35-49                                    | 25 (32.9)          | 13 (17.1) | 38 (50.0) |       | 28 (33.3)            | 9 (10.7)  | 47 (56.0)  |       | 256 (44.7)          | 46 (8.0)   | 271 (47.3) |       |
| 50+                                      | 10 (20.4)          | 8 (16.3)  | 31 (63.3) |       | 10 (27.0)            | 7 (18.9)  | 20 (54.1)  |       | 100 (27.7)          | 35 (9.7)   | 226 (62.6) |       |
| <b>Race/ethnicity</b>                    |                    |           |           |       |                      |           |            |       |                     |            |            |       |
| NH-white                                 | 51 (33.3)          | 28 (18.3) | 74 (48.4) | 0.10  | 63 (34.8)            | 20 (11.1) | 98 (54.1)  | 0.62  | 450 (39.9)          | 118 (10.5) | 561 (49.7) | <0.01 |
| Non-white <sup>a</sup>                   | 3 (12.5)           | 6 (25.0)  | 15 (62.5) |       | 21 (42.9)            | 4 (8.2)   | 24 (49.0)  |       | 71 (31.6)           | 43 (19.1)  | 111 (49.3) |       |
| <b>No. of children</b>                   |                    |           |           |       |                      |           |            |       |                     |            |            |       |
| 0                                        | 29 (32.2)          | 18 (20.0) | 43 (47.8) | 0.79  | 58 (38.2)            | 14 (9.2)  | 80 (52.6)  | 0.61  | 244 (32.5)          | 107 (14.3) | 399 (53.2) | <0.01 |
| 1 or more                                | 25 (28.7)          | 16 (18.4) | 46 (52.9) |       | 26 (33.3)            | 10 (12.8) | 42 (53.9)  |       | 277 (45.9)          | 54 (8.9)   | 273 (45.2) |       |
| <b>Educational status</b>                |                    |           |           |       |                      |           |            |       |                     |            |            |       |
| Not a college grad                       | 14 (23.3)          | 16 (26.7) | 30 (50.0) | 0.13  | 19 (33.3)            | 8 (14.0)  | 30 (52.6)  | 0.56  | 58 (28.3)           | 44 (21.5)  | 103 (50.2) | <0.01 |
| College grad/more                        | 40 (34.2)          | 18 (15.4) | 59 (50.4) |       | 65 (37.6)            | 16 (9.3)  | 92 (53.2)  |       | 463 (40.3)          | 117 (10.2) | 569 (49.5) |       |
| <b>Job status</b>                        |                    |           |           |       |                      |           |            |       |                     |            |            |       |
| Employed/student                         | 46 (31.9)          | 32 (22.2) | 66 (45.8) | 0.03  | 72 (37.7)            | 16 (8.4)  | 103 (53.9) | 0.08  | 446 (39.4)          | 143 (12.6) | 544 (48.0) | 0.02  |
| Unemployed/other                         | 8 (24.2)           | 2 (6.1)   | 23 (69.7) |       | 12 (30.8)            | 8 (20.5)  | 19 (48.7)  |       | 75 (33.9)           | 18 (8.1)   | 128 (57.9) |       |
| <b>Disability status</b>                 |                    |           |           |       |                      |           |            |       |                     |            |            |       |
| None                                     | 49 (30.8)          | 29 (18.2) | 81 (50.9) | 0.57  | 70 (35.9)            | 19 (9.7)  | 106 (54.4) | 0.51  | 484 (38.3)          | 151 (12.0) | 629 (49.8) | 0.87  |
| 1 or more                                | 5 (27.8)           | 5 (27.8)  | 8 (44.4)  |       | 14 (40.0)            | 5 (14.3)  | 16 (45.7)  |       | 37 (41.1)           | 10 (11.1)  | 43 (47.8)  |       |
| <b>Body mass index</b>                   |                    |           |           |       |                      |           |            |       |                     |            |            |       |
| Normal                                   | 15 (27.8)          | 14 (25.9) | 25 (46.3) | 0.32  | 39 (37.5)            | 8 (7.7)   | 57 (54.8)  | 0.47  | 200 (35.7)          | 91 (16.3)  | 269 (48.0) | <0.01 |
| Overwt/obese                             | 39 (31.7)          | 20 (16.3) | 64 (52.0) |       | 45 (35.7)            | 16 (12.7) | 65 (51.6)  |       | 321 (40.4)          | 70 (8.8)   | 403 (50.8) |       |
| <b>Comorbid condition[s]</b>             |                    |           |           |       |                      |           |            |       |                     |            |            |       |
| None                                     | 33 (32.0)          | 19 (18.5) | 51 (49.5) | 0.86  | 52 (38.2)            | 10 (7.4)  | 74 (54.4)  | 0.18  | 319 (37.9)          | 110 (13.1) | 412 (49.0) | 0.22  |
| 1 or more                                | 21 (28.4)          | 15 (20.3) | 38 (51.4) |       | 32 (34.0)            | 14 (14.9) | 48 (51.1)  |       | 202 (39.4)          | 51 (9.9)   | 260 (50.7) |       |
| <b>Local stay-at-home order duration</b> |                    |           |           |       |                      |           |            |       |                     |            |            |       |
| Wks, mean (SD)                           | 3.8 (1.1)          | 3.9 (1.0) | 3.7 (0.8) | 0.61  | 4.1 (1.0)            | 4.2 (0.9) | 4.1 (0.9)  | 0.79  | 3.8 (0.9)           | 4.1 (0.9)  | 3.8 (0.9)  | <0.01 |
| <b>Time spent at home</b>                |                    |           |           |       |                      |           |            |       |                     |            |            |       |
| Hrs, median (IQR)                        | 23.0               | 23.0      | 21.0      | 0.24  | 22.5                 | 22.0      | 22.0       | 0.36  | 23.0                | 23.0       | 22.0       | <0.01 |

|                         | (20.0-23.0) | (20.0-23.0) | (20.0-23.0) |      | (21.0-23.0) | (21.0-23.5) | (20.0-23.0) |       | (22.0-23.0) | (22.0-24.0) | (21.0-23.0) |       |
|-------------------------|-------------|-------------|-------------|------|-------------|-------------|-------------|-------|-------------|-------------|-------------|-------|
| <b>Depression score</b> |             |             |             |      |             |             |             |       |             |             |             |       |
| None or mild            | 37 (26.8)   | 25 (18.1)   | 76 (55.1)   | 0.05 | 50 (30.1)   | 16 (9.6)    | 100 (60.2)  | <0.01 | 368 (33.5)  | 131 (11.9)  | 599 (54.6)  | <0.01 |
| Moderate or severe      | 17 (43.6)   | 9 (23.1)    | 13 (33.3)   |      | 34 (53.1)   | 8 (12.5)    | 22 (34.4)   |       | 153 (59.8)  | 30 (11.7)   | 73 (28.5)   |       |

Abbreviations: grad, graduate; Hrs, hours; IQR, interquartile range; NH-, non-Hispanic; Overwt, overweight; SD, standard deviation; Wks, weeks.

Note: <sup>a</sup> Includes American Indian/Alaska Native, Asian, Native Hawaiian or other Pacific Islander, Black or African American, more than one race, and unknown/not reported. <sup>b</sup> Includes homemaker/stay-at-home parent, retired, and unable to work <sup>c</sup> Estimated using the Patient Health Questionnaire-9 (PHQ-9), and categorized based on 0-5: none/mild; >5: moderate or severe.

**Table S2S3.** Characteristics of a sample of US adults changing positive [health](#) behaviors during the COVID-19 pandemic.

|                                          | Sleep quality, n (%) |                     |                     | P     | Physical activity, n (%) |                     |                     | P     |
|------------------------------------------|----------------------|---------------------|---------------------|-------|--------------------------|---------------------|---------------------|-------|
|                                          | Improved             | Worsened            | Same                |       | Increased                | Decreased           | Same                |       |
| <b>Overall</b>                           | 175 (9.7)            | 560 (31.0)          | 1074 (59.4)         | <0.01 | 455 (25.2)               | 706 (39.0)          | 648 (35.8)          | <0.01 |
| <b>Sex</b>                               |                      |                     |                     |       |                          |                     |                     |       |
| Male                                     | 53 (9.0)             | 140 (23.8)          | 396 (67.2)          | <0.01 | 131 (22.2)               | 205 (34.8)          | 253 (43.0)          | <0.01 |
| Female                                   | 122 (10.0)           | 420 (34.4)          | 678 (55.6)          |       | 324 (26.6)               | 501 (41.1)          | 395 (32.4)          |       |
| <b>Age</b>                               |                      |                     |                     |       |                          |                     |                     |       |
| 18-34                                    | 62 (10.9)            | 188 (33.0)          | 320 (56.1)          | <0.01 | 142 (24.9)               | 240 (42.1)          | 188 (33.0)          | 0.01  |
| 35-49                                    | 79 (11.0)            | 247 (34.3)          | 394 (54.7)          |       | 206 (28.6)               | 261 (36.3)          | 253 (35.1)          |       |
| 50+                                      | 34 (6.6)             | 125 (24.1)          | 360 (69.4)          |       | 107 (20.6)               | 205 (39.5)          | 207 (39.9)          |       |
| <b>Race/ethnicity</b>                    |                      |                     |                     |       |                          |                     |                     |       |
| NH-white                                 | 132 (8.9)            | 452 (30.5)          | 899 (60.6)          | 0.02  | 378 (25.5)               | 562 (37.9)          | 543 (36.6)          | 0.11  |
| Non-white <sup>a</sup>                   | 43 (13.2)            | 108 (33.1)          | 175 (53.7)          |       | 77 (23.6)                | 144 (44.2)          | 105 (32.2)          |       |
| <b>No. of children</b>                   |                      |                     |                     |       |                          |                     |                     |       |
| 0                                        | 100 (9.8)            | 296 (29.0)          | 626 (61.3)          | 0.11  | 215 (21.0)               | 437 (42.8)          | 370 (36.2)          | <0.01 |
| 1 or more                                | 75 (9.5)             | 264 (33.6)          | 448 (56.9)          |       | 240 (30.5)               | 269 (34.2)          | 278 (35.3)          |       |
| <b>Educational status</b>                |                      |                     |                     |       |                          |                     |                     |       |
| Not a college grad                       | 27 (8.9)             | 85 (28.2)           | 190 (62.9)          | 0.39  | 59 (19.5)                | 140 (46.4)          | 103 (34.1)          | <0.01 |
| College grad/more                        | 148 (9.8)            | 475 (31.5)          | 884 (58.7)          |       | 396 (26.3)               | 566 (37.6)          | 545 (36.2)          |       |
| <b>Job status</b>                        |                      |                     |                     |       |                          |                     |                     |       |
| Employed/student                         | 156 (10.6)           | 462 (31.4)          | 852 (58.0)          | <0.01 | 389 (26.5)               | 556 (37.8)          | 525 (35.7)          | 0.02  |
| Unemployed/other                         | 19 (5.6)             | 98 (28.9)           | 222 (65.5)          |       | 66 (19.5)                | 150 (44.3)          | 123 (36.3)          |       |
| <b>Disability status</b>                 |                      |                     |                     |       |                          |                     |                     |       |
| None                                     | 161 (9.7)            | 504 (30.2)          | 1004 (60.2)         | 0.04  | 433 (25.9)               | 627 (37.6)          | 609 (36.5)          | <0.01 |
| 1 or more                                | 14 (10.0)            | 56 (40.0)           | 70 (50.0)           |       | 22 (15.7)                | 79 (56.4)           | 39 (27.9)           |       |
| <b>Body mass index</b>                   |                      |                     |                     |       |                          |                     |                     |       |
| Normal                                   | 77 (10.4)            | 223 (30.2)          | 438 (59.4)          | 0.62  | 210 (28.5)               | 271 (36.7)          | 257 (34.8)          | 0.02  |
| Overwt/obese                             | 98 (9.2)             | 337 (31.5)          | 636 (59.4)          |       | 245 (22.9)               | 435 (40.6)          | 391 (36.5)          |       |
| <b>Comorbid condition[s]</b>             |                      |                     |                     |       |                          |                     |                     |       |
| None                                     | 115 (10.5)           | 295 (26.8)          | 690 (62.7)          | <0.01 | 297 (27.0)               | 396 (36.0)          | 407 (37.0)          | <0.01 |
| 1 or more                                | 60 (8.5)             | 265 (37.4)          | 384 (54.2)          |       | 158 (22.3)               | 310 (43.7)          | 241 (34.0)          |       |
| <b>Local stay-at-home order duration</b> |                      |                     |                     |       |                          |                     |                     |       |
| Wks, mean (SD)                           | 3.9 (0.9)            | 3.8 (1.0)           | 3.9 (0.8)           | 0.26  | 3.8 (0.9)                | 3.9 (0.9)           | 3.8 (0.8)           | 0.02  |
| <b>Time spent at home</b>                |                      |                     |                     |       |                          |                     |                     |       |
| Hrs, median (IQR)                        | 23.0<br>(22.0-23.0)  | 23.0<br>(22.0-23.0) | 22.0<br>(21.0-23.0) | <0.01 | 23.0<br>(22.0-23.0)      | 23.0<br>(22.0-24.0) | 22.0<br>(20.0-23.0) | <0.01 |
| <b>Depression score</b>                  |                      |                     |                     |       |                          |                     |                     |       |
| None or mild                             | 157 (10.7)           | 345 (23.4)          | 972 (65.9)          | <0.01 | 383 (26.0)               | 489 (33.2)          | 602 (40.8)          | <0.01 |
| Moderate or severe                       | 18 (5.4)             | 215 (64.2)          | 102 (30.5)          |       | 72 (21.5)                | 217 (64.8)          | 46 (13.7)           |       |

Abbreviations: grad, graduate; Hrs, hours; IQR, interquartile range; NH-, non-Hispanic; Overwt, overweight; SD, standard deviation; Wks, weeks.

Note: <sup>a</sup> Includes American Indian/Alaska Native, Asian, Native Hawaiian or other Pacific Islander, Black or African American, more than one race, and unknown/not reported. <sup>b</sup> Includes homemaker/stay-at-home parent, retired, and unable to work <sup>c</sup> Estimated using the Patient Health Questionnaire-9 (PHQ-9), and categorized based on 0-5: none/mild; >5: moderate or severe

**Table S3S4.** Reasons for changing negative health behaviors.

| <b>Negative health behavior change and motivations</b> | <b>N (%)</b>  | <b>n (%)</b> |
|--------------------------------------------------------|---------------|--------------|
| <b>Total reasons given for change</b>                  | 1,913 (100.0) |              |
| <b>Tobacco use - decreased</b>                         | 63 (3.3)      | 63 (100.0)   |
| More responsibility                                    | 8 (0.4)       | 8 (12.7)     |
| Less time available                                    | 4 (0.2)       | 4 (6.3)      |
| Less places to use tobacco                             | 6 (0.3)       | 6 (9.5)      |
| Don't want to spend money on tobacco                   | 13 (0.7)      | 13 (20.6)    |
| Maintain health                                        | 24 (1.3)      | 24 (38.1)    |
| Illness                                                | 0 (0.0)       | 0 (0.0)      |
| Other                                                  | 8 (0.4)       | 8 (12.7)     |
| <b>Marijuana use - decreased</b>                       | 29 (1.5)      | 29 (100.0)   |
| More responsibility                                    | 3 (0.2)       | 3 (10.3)     |
| Less time available                                    | 1 (0.1)       | 1 (3.4)      |
| Less places to use marijuana                           | 3 (0.2)       | 3 (10.3)     |
| Don't want to spend money on marijuana                 | 3 (0.2)       | 3 (10.3)     |
| Maintain health                                        | 8 (0.4)       | 8 (27.6)     |
| Illness                                                | 0 (0.0)       | 0 (0.0)      |
| Other                                                  | 11 (0.6)      | 11 (37.9)    |
| <b>Alcohol consumption - decreased</b>                 | 224 (11.7)    | 224 (100.0)  |
| More responsibility                                    | 20 (1.0)      | 20 (8.9)     |
| Less time available                                    | 25 (1.3)      | 25 (11.2)    |
| Don't want to spend money on alcohol                   | 33 (1.7)      | 33 (14.7)    |
| Maintain health                                        | 75 (3.9)      | 75 (33.5)    |
| Other                                                  | 71 (3.7)      | 71 (31.7)    |
| <b>Tobacco use - increased</b>                         | 119 (6.2)     | 119 (100.0)  |
| Less responsibility                                    | 4 (0.2)       | 4 (3.4)      |
| More time available                                    | 33 (1.7)      | 33 (27.7)    |
| Unhappiness                                            | 9 (0.5)       | 9 (7.6)      |
| Worry/concern about health                             | 16 (0.8)      | 16 (13.4)    |
| Worry/concern about job security                       | 9 (0.5)       | 9 (7.6)      |
| Loneliness                                             | 9 (0.5)       | 9 (7.6)      |
| Boredom                                                | 31 (1.6)      | 31 (26.1)    |
| Other                                                  | 8 (0.4)       | 8 (6.7)      |
| <b>Marijuana use - increased</b>                       | 246 (12.9)    | 246 (100.0)  |
| Less responsibility                                    | 35 (1.8)      | 35 (14.2)    |
| More time available                                    | 51 (2.7)      | 51 (20.7)    |
| Unhappiness                                            | 24 (1.3)      | 24 (9.8)     |
| Worry/concern about health                             | 21 (1.1)      | 21 (8.5)     |
| Worry/concern about job security                       | 13 (0.7)      | 13 (5.3)     |
| Loneliness                                             | 25 (1.3)      | 25 (10.2)    |
| Boredom                                                | 57 (3.0)      | 57 (23.2)    |

|                                        |                    |                     |
|----------------------------------------|--------------------|---------------------|
| Other                                  | 20 (1.0)           | 20 (8.1)            |
| <b>Alcohol consumption - increased</b> | <b>1232 (64.4)</b> | <b>1232 (100.0)</b> |
| Less responsibility                    | 176 (9.2)          | 176 (14.3)          |
| More time available                    | 347 (18.1)         | 347 (28.2)          |
| Unhappiness                            | 89 (4.7)           | 89 (7.2)            |
| Worry/concern about health             | 113 (5.9)          | 113 (9.2)           |
| Worry/concern about job security       | 70 (3.7)           | 70 (5.7)            |
| Loneliness                             | 71 (3.7)           | 71 (5.8)            |
| Boredom                                | 287 (15.0)         | 287 (23.3)          |
| Other                                  | 79 (4.1)           | 79 (6.4)            |

---

**Table S4S5.** Reasons for changing positive health behaviors during COVID-19 pandemic.

| <b>Positive behavior change and motivations</b> | <b>N (%)</b>  | <b>n (%)</b>  |
|-------------------------------------------------|---------------|---------------|
| <b>Total reasons given for change</b>           | 4,152 (100.0) |               |
| <b>Physical activity - increased</b>            | 1,499 (36.1)  | 1,499 (100.0) |
| More time available                             | 359 (8.6)     | 359 (23.9)    |
| Boredom                                         | 254 (6.1)     | 254 (16.9)    |
| Social connection                               | 230 (5.5)     | 230 (15.3)    |
| Stress relief                                   | 305 (7.3)     | 305 (20.3)    |
| Health concerns                                 | 334 (8.0)     | 334 (22.3)    |
| Other                                           | 17 (0.4)      | 17 (1.1)      |
| <b>Sleep quality - improved</b>                 | 717 (17.3)    | 717 (100.0)   |
| More time available                             | 421 (10.1)    | 421 (58.7)    |
| Less work responsibility/time                   | 150 (3.6)     | 150 (20.9)    |
| Stress                                          | 114 (2.7)     | 114 (15.9)    |
| Other                                           | 32 (0.8)      | 32 (4.5)      |
| <b>Physical activity - decreased</b>            | 1,361 (32.8)  | 1,361 (100.0) |
| Less time available                             | 112 (2.7)     | 112 (8.2)     |
| Less motivation                                 | 434 (10.5)    | 434 (31.9)    |
| More worried/stressed                           | 229 (5.5)     | 229 (16.8)    |
| Lack of locations to be active                  | 327 (7.9)     | 327 (24.0)    |
| Lack of persons to be active with               | 127 (3.1)     | 127 (9.3)     |
| Illness                                         | 6 (0.1)       | 6 (0.4)       |
| Other                                           | 126 (3.0)     | 126 (9.3)     |
| <b>Sleep quality - worsened</b>                 | 575 (13.8)    | 575 (100.0)   |
| Less time available                             | 33 (0.8)      | 33 (5.7)      |
| More work responsibility/time                   | 76 (1.8)      | 76 (13.2)     |
| More worried/stressed                           | 370 (8.9)     | 370 (64.4)    |
| Illness                                         | 1 (0.0)       | 1 (0.2)       |
| Other                                           | 95 (2.3)      | 95 (16.5)     |
